# Supplementary material
Source: PubMed Central journal article supplement (PMC3033717)
Supplement: supp_110.174904_JPET174904Supplemental_data.pdf [file supp_110.174904_JPET174904Supplemental_data.pdf]

Anna E. Maciag, Harinath Chakrapani, Joseph E. Saavedra, Nicole L. Morris, Ryan J. Holland, Ken M. Kosak, Paul J. Shami, Lucy M. Anderson, and Larry K. Keefer

## The Nitric Oxide Prodrug JS-K is Effective Against Non-small Cell Lung Cancer Cells *in vitro* and *in vivo*: Involvement of Reactive Oxygen Species

### Supplemental data

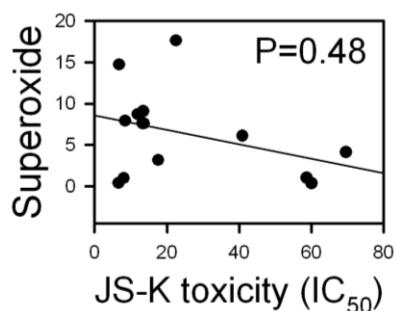

Fig. S1 JS-K toxicity measured as IC<sub>50</sub> values did not correlate with levels of superoxide measured as nitroblue tetrazolium reduction<sup>1</sup> in NSCLC cells.

<sup>1</sup> Romanowska M, Maciag A, Smith AL, Fields JR, Fornwald LW, Kikawa KD, Kasprzak KS, Anderson LM. (2007) DNA damage, superoxide, and mutant K-ras in human lung adenocarcinoma cells. *Free Radic Biol Med* 43:1145-1155.

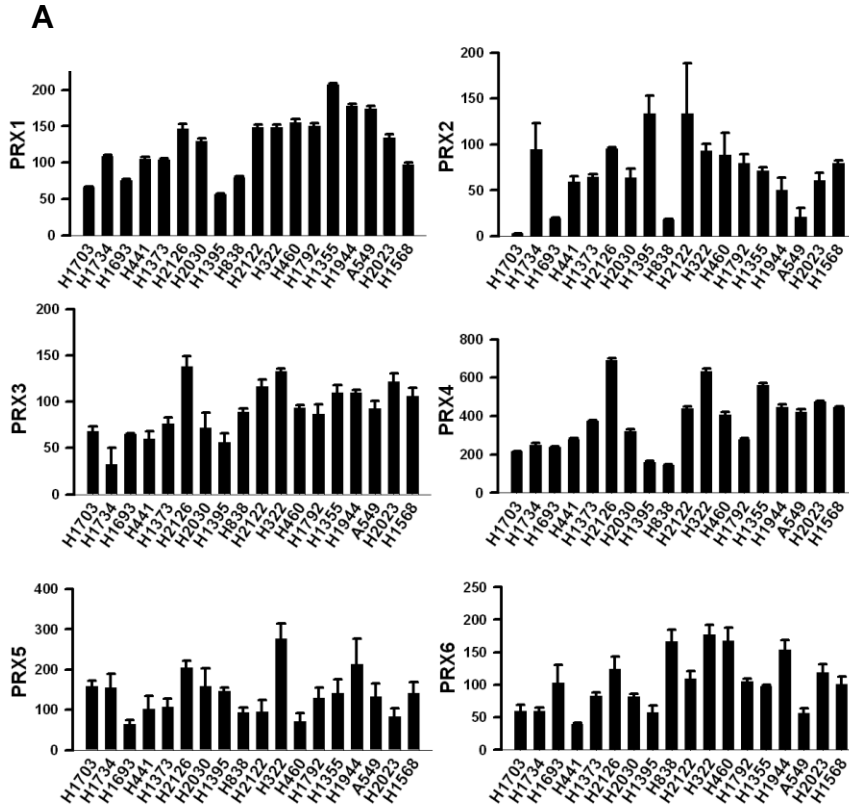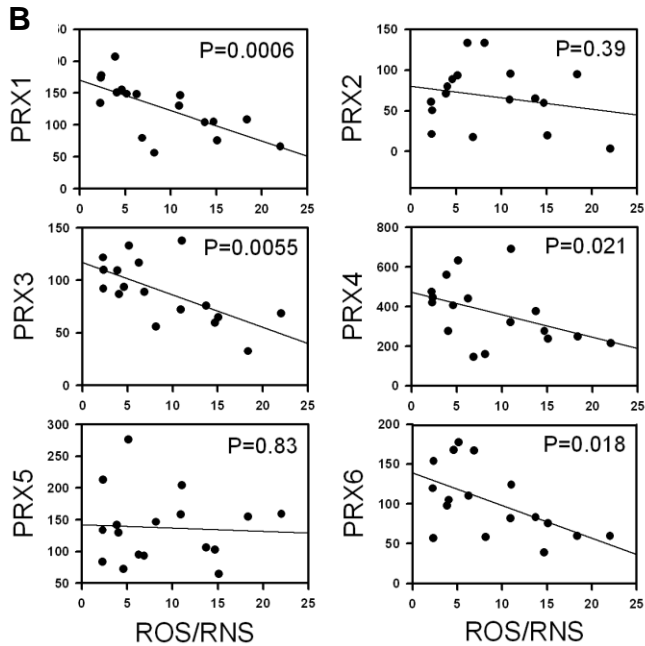

Fig. S2 A) Peroxiredoxins (PRX) 1-6 protein levels in NSCLC cells, as analyzed by Western blot (expressed relative to HPL1D cell line used as an internal control). B) PRX1, 3, 4 and 6 expression levels correlated significantly (negatively) with endogenous levels of ROS/RNS measured as DCF fluorescence.

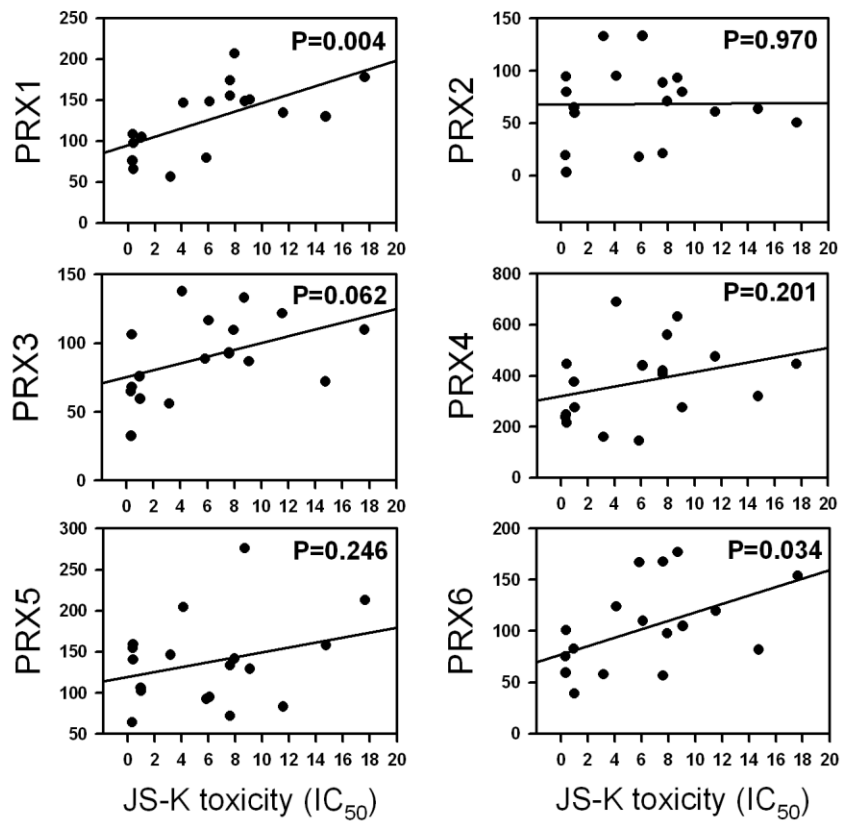

Fig. S3 PRX1 and 6 levels correlated significantly with JS-K toxicity, expressed as IC<sub>50</sub> values. Other peroxiredoxins did not correlate.
